# Supplementary material for: The influence of bridge-reduced state levels on the electron transfer within the 2,7-dinitroanthracene radical anion
Source: Royal Society of Chemistry journal article supplement (doi:10.1039/c4cp05404k), 2015-01-01
Supplement: c4cp05404k1.pdf [file c4cp05404k1.pdf]

## **SUPPORTING INFORMATION**

### **Influence of bridge-reduced state levels on the electron transfer within 2,7-dinitroanthracene radical anion**

João P. Telo and Álvaro Moneo

Centro Química Estrutural, Instituto Superior Técnico, Universidade de Lisboa,  
Av. Rovisco Pais, 1049-001 Lisboa, Portugal. [jptelo@tecnico.ulisboa.pt](mailto:jptelo@tecnico.ulisboa.pt)

#### **Table of Contents**

S2 Experimental Techniques

S3 Theoretical Calculations

S3 Three-Stage Model

S5 Optimized Geometry Coordinates

## Experimental Techniques

2,7-Dinitroanthracene (3): 2,7-Dinitroanthracene was prepared by pyrolysis of a mixture of 2,6- and 2,7-dinitro-9,10-ethano-9,10-dihydroanthracene under vacuum<sup>S1</sup> and separated from the 2,6-dinitro isomer by a combination of column chromatography and fractional recrystallization from benzene. mp >300°;  $m/z$  268 (M<sup>+</sup>); <sup>1</sup>H NMR (300 MHz; DMSO-*d*<sub>6</sub>)  $\delta$  9.33 (s, H<sub>9</sub>), 9.19 (s, 2H<sub>1,8</sub>), 8.91 (s, H<sub>10</sub>), 8.37 (d, 2H<sub>3,6</sub>  $J$ =9.3 Hz), 8.26 (d, 2H<sub>4,5</sub>  $J$ =9.3 Hz). UV (MeCN):  $\lambda_{\text{max}}$ =404 nm (log  $\epsilon$ =3.78). EPR (radical anion, MeCN, RT)  $a_{2\text{N}}$  = 3.00 G,  $a_{2\text{H}}$  = 4.16 G,  $a_{2\text{H}}$  = 0.375 G,  $a_{2\text{H}}$  = 1.00 G,  $a_{\text{H}}$  = 3.98 G,  $a_{\text{H}}$  = 0.53 G.

### *Preparation of radical anions*

The radical anions were prepared in vacuum-sealed glass cells equipped with an ESR tube and a quartz optical cell. Compound **3**, an excess of commercial cryptand[2.2.2], and 0.3% Na-Hg amalgam were introduced in different chambers of the cell under nitrogen. The cryptand was degassed by melting under high vacuum before addition of the solvent. THF was directly distilled in the vacuum line from an ampoule where it was stored under 1:3 Na/K alloy. MeCN, DMSO and PhCN were dried over CaH<sub>2</sub>, decanted and distilled before addition to the cell, and degassed in several pump-thaw cycles. The concentration of the samples was determined spectrophotometrically before reduction. Reduction was achieved by contact with the 0.2% Na-Hg amalgam. UV/vis/NIR spectra were recorded at room temperature at several stages of reduction, so that the maximum radical anion oxidation level spectrum could be selected.

### *Instrumentation*

UV/vis/NIR spectra were obtained with a Shimadzu UV-3101PC spectrometer. EPR spectra were measured in a Bruker esp300e spectrometer. NMR spectra were recorded on a Bruker Avance III 300 spectrometer.

## Theoretical Calculations

Structure optimizations and TD-DFT calculations were performed using Gaussian09 at the UB3LYP/6-31+G(2d,p) level and a CPCM solvent model.<sup>S2</sup>

## Three-Stage Model

The determinant of equation 1 is an equation of the form

$$a E^3 + b E^2 + c E + d = 0 \quad S1$$

with

$$a = 1 \quad S2$$

$$b = -(H_a + H_b + H_c) \quad S3$$

$$c = H_a \cdot H_b + H_a \cdot H_c + H_b \cdot H_c - H_{ab}^2 - 2 H_{ic}^2 \quad S4$$

and

$$d = -H_a \cdot H_b \cdot H_c + H_a \cdot H_{ic}^2 + H_b \cdot H_{ic}^2 + H_c \cdot H_{ab}^2 - 2 H_{ab} \cdot H_{ic}^2 \quad S5$$

The diabatic surfaces representing the CBU's are given by  $H_a = \lambda x^2$  and  $H_b = \lambda (1-x)^2$ , where  $x$  is the reaction coordinate, and the diabatic surface representing the bridge is  $H_c = \lambda (1/2-x)^2 + \Delta$ , where  $\Delta$  is the vertical energy displacement of the  $H_c$  minimum. Although the cubic equation above has three real roots, the formulas expressing these roots often involve imaginary numbers. To avoid this, equation S1 was solved numerically for the whole range of  $x$  values using trigonometric functions.

For delocalized ground states the electronic transitions will be the energy difference of the adiabatic states at  $x=1/2$ , and for this point the equation has analytic solutions. For  $H_{ab}=0$  we get

$$X_{1 (x=0.5)} = \lambda/8 + \Delta/2 - 1/2 ((\Delta-\lambda/4)^2 + 8H_{ic}^2)^{1/2} \quad S6$$

$$X_{2 (x=0.5)} = \lambda/4 \quad S7$$

and

$$X_{3 (x=0.5)} = \lambda/8 + \Delta/2 + 1/2 ((\Delta-\lambda/4)^2 + 8H_{ic}^2)^{1/2} \quad S8$$

so the two electronic transitions will be

$$E_{\text{op}}^1 = X_2 - X_1 = -1/2(\Delta - \lambda/4) + 1/2 ((\Delta - \lambda/4)^2 + 8H_{\text{ic}}^2)^{1/2} \quad \text{S9}$$

and

$$E_{\text{op}}^2 = X_3 - X_1 = ((\Delta - \lambda/4)^2 + 8H_{\text{ic}}^2)^{1/2} \quad \text{S10}$$

One should note that the difference

$$E_{\text{op}}^1 - 1/2 E_{\text{op}}^2 = -1/2(\Delta - \lambda/4) \quad \text{S11}$$

is independent of the coupling  $H_{\text{ic}}$  and yields  $(\Delta - \lambda/4)$  directly. Once the  $(\Delta - \lambda/4)$  value is determined,  $H_{\text{ic}}$  can be easily extracted from S9 or S10. Using the energies of the two first bands of **3<sup>-</sup>** in THF ( $E_{\text{op}}^1 = 4200 \text{ cm}^{-1}$  and  $E_{\text{op}}^2 = 12900 \text{ cm}^{-1}$ ) yields  $(\Delta - \lambda/4) = 4500 \text{ cm}^{-1}$  and  $H_{\text{ic}} = 4275 \text{ cm}^{-1}$ . A delocalised ground-state is obtained for  $\lambda < 6000 \text{ cm}^{-1}$ , yielding  $\Delta = 6000 \text{ cm}^{-1}$  for  $\lambda = 6000 \text{ cm}^{-1}$ . As noted above, equations S6-S11 are only valid for delocalised ground-state surfaces and for  $H_{\text{ab}} = 0$ . Further calculations (for charge-localised ground-states and/or for  $H_{\text{ab}} \neq 0$ ) were done by solving equation S1 numerically. Changing the solvent to MeCN (where  $E_{\text{op}}^1 = 7670 \text{ cm}^{-1}$  and  $E_{\text{op}}^2 = 13000 \text{ cm}^{-1}$ ) should increase  $\lambda$  significantly, but we couldn't fit the energies of the two bands without decreasing  $H_{\text{ic}}$ . The best fit was achieved with  $\lambda = 10200 \text{ cm}^{-1}$ ,  $\Delta = 7000 \text{ cm}^{-1}$  and  $H_{\text{ic}} = 2800 \text{ cm}^{-1}$ .

## Optimized Geometry Coordinates

### 2,7-Dinitroanthracene 3<sup>-</sup>, delocalised

UB3LYP/6-31+G(2d,p) ; (cpcm, solvent=thf)

|   |          |          |           |
|---|----------|----------|-----------|
| C | 0.005581 | 0.000037 | -0.001796 |
| C | 0.005775 | 0.000023 | 1.417763  |
| C | 1.197927 | 0.000015 | 2.093996  |
| C | 2.448709 | 0.000018 | 1.403826  |
| C | 2.442330 | 0.000032 | -0.044141 |
| C | 1.199915 | 0.000041 | -0.720892 |
| C | 3.673210 | 0.000009 | 2.084226  |
| C | 4.898414 | 0.000012 | 1.405076  |

|   |           |           |           |
|---|-----------|-----------|-----------|
| C | 4.906251  | 0.000026  | -0.042880 |
| C | 3.674642  | 0.000035  | -0.727583 |
| C | 6.148482  | 0.000003  | 2.096520  |
| C | 7.341329  | 0.000006  | 1.421504  |
| C | 7.342942  | 0.000019  | 0.001953  |
| C | 6.149360  | 0.000029  | -0.718365 |
| N | -1.236794 | 0.000046  | -0.689506 |
| O | -1.235860 | 0.000064  | -1.942613 |
| O | -2.304635 | 0.000034  | -0.030381 |
| N | 8.586052  | 0.000022  | -0.684508 |
| O | 8.586416  | 0.000036  | -1.937588 |
| O | 9.653178  | 0.000010  | -0.024279 |
| H | -0.939029 | 0.000020  | 1.944528  |
| H | 1.203757  | 0.000005  | 3.179792  |
| H | 1.172927  | 0.000052  | -1.802742 |
| H | 3.672654  | -0.000001 | 3.171076  |
| H | 3.675199  | 0.000045  | -1.814033 |
| H | 6.141543  | -0.000007 | 3.182310  |
| H | 8.285595  | -0.000002 | 1.949230  |
| H | 6.177456  | 0.000038  | -1.800188 |

2,7-Dinitroanthracene 3<sup>-</sup>, localised

UB3LYP/6-31+G(2d,p); (cpcm,solvent=Acetonitrile)

|   |           |           |           |
|---|-----------|-----------|-----------|
| C | 0.000000  | 0.000000  | 0.000000  |
| C | 0.000000  | 0.000000  | 1.426542  |
| C | 1.180046  | 0.000000  | 2.115263  |
| C | 2.442893  | -0.000448 | 1.437750  |
| C | 2.443248  | -0.000903 | -0.012325 |
| C | 1.208773  | -0.000694 | -0.703064 |
| C | 3.653797  | -0.000407 | 2.131444  |
| C | 4.890398  | -0.000773 | 1.464628  |
| C | 4.902338  | -0.001211 | 0.019292  |
| C | 3.682066  | -0.001285 | -0.680896 |
| C | 6.131286  | -0.000691 | 2.164789  |
| C | 7.331316  | -0.001020 | 1.499112  |
| C | 7.326682  | -0.001436 | 0.082011  |
| C | 6.151854  | -0.001538 | -0.648693 |
| N | -1.221273 | -0.000056 | -0.682514 |
| O | -1.218970 | -0.012094 | -1.956158 |
| O | -2.315947 | -0.010643 | -0.027587 |
| N | 8.589275  | -0.001764 | -0.618012 |
| O | 8.586354  | -0.002961 | -1.857416 |
| O | 9.636712  | -0.002465 | 0.045887  |
| H | -0.948769 | 0.000344  | 1.945724  |
| H | 1.174394  | 0.000389  | 3.200435  |
| H | 1.196306  | -0.000891 | -1.784464 |
| H | 3.641585  | -0.000040 | 3.217449  |
| H | 3.697717  | -0.001570 | -1.766555 |

|   |          |           |           |
|---|----------|-----------|-----------|
| H | 6.117022 | -0.000351 | 3.249629  |
| H | 8.271613 | -0.000951 | 2.031778  |
| H | 6.187345 | -0.001859 | -1.730011 |

---

<sup>S1</sup> H. Tanida, H. Ishitobi, *Tetrahedron Lett.*, 1964, **15**, 807.

<sup>S2</sup> Gaussian 09, M. J. Frisch, G. W. Trucks, H. B. Schlegel, G. E. Scuseria, M. A. Robb, J. R. Cheeseman, G. Scalmani, V. Barone, B. Mennucci, G. A. Petersson, H. Nakatsuji, M. Caricato, X. Li, H. P. Hratchian, A. F. Izmaylov, J. Bloino, G. Zheng, J. L. Sonnenberg, M. Hada, M. Ehara, K. Toyota, R. Fukuda, J. Hasegawa, M. Ishida, T. Nakajima, Y. Honda, O. Kitao, H. Nakai, T. Vreven, J. A. Montgomery, Jr., J. E. Peralta, F. Ogliaro, M. Bearpark, J. J. Heyd, E. Brothers, K. N. Kudin, V. N. Staroverov, R. Kobayashi, J. Normand, K. Raghavachari, A. Rendell, J. C. Burant, S. S. Iyengar, J. Tomasi, M. Cossi, N. Rega, J. M. Millam, M. Klene, J. E. Knox, J. B. Cross, V. Bakken, C. Adamo, J. Jaramillo, R. Gomperts, R. E. Stratmann, O. Yazyev, A. J. Austin, R. Cammi, C. Pomelli, J. W. Ochterski, R. L. Martin, K. Morokuma, V. G. Zakrzewski, G. A. Voth, P. Salvador, J. J. Dannenberg, S. Dapprich, A. D. Daniels, Ö. Farkas, J. B. Foresman, J. V. Ortiz, J. Cioslowski, and D. J. Fox, Gaussian, Inc., Wallingford CT, 2009.
